# Supplementary material
Source: PubMed Central journal article supplement (PMC8530243)
Supplement: jpcrr-8.4.340_suppl_appendix_B.pdf [file jpcrr-8.4.340_suppl_appendix_B.pdf]

## APPENDIX B: Survey Question Block 2

Please indicate your year of birth.

|                    | Year                      |
|--------------------|---------------------------|
| Please Select: (1) | ▼ 1900 (1 ... 2049 (150)) |

---

V86

Do you consider yourself to be:

- A woman (1)
  - A man (2)
  - Other (please specify) (4) \_\_\_\_\_
-

V88

What is your current relationship status?

Married (1)

Partnered (2)

Divorced (3)

Widowed (6)

Separated (7)

Single (4)

Dating (8)

Other (please explain) (5) \_\_\_\_\_

---

Which best describes your race/ethnicity? **(Select all that apply)**

- White (2)
  - Hispanic, Latino or Spanish origin (1)
  - Black or African American (3)
  - Asian (4)
  - American Indian or Alaska Native (5)
  - Middle Eastern or North African (6)
  - Native Hawaiian or Other Pacific Islander (7)
  - Some other race, ethnicity or origin (8)
-

V102

Which option best describes your **current** occupational status?

- Employed - full-time (1)
  - Employed - part-time (10)
  - Furloughed due to COVID-19 (2)
  - Unemployed due to COVID-19 (3)
  - Unemployed prior to COVID-19 (4)
  - Caretaker/Homemaker (6)
  - Not working due to disability (7)
  - Retired (8)
  - Student - full-time (9)
  - Student - part-time (11)
  - Other (Please specify) (5) \_\_\_\_\_
- 

V103

What was your **2019** household income?

- Under \$10,000 (1)
  - \$10,000-\$49,000 (2)
  - \$50,000-\$99,000 (3)
  - More than \$100,000 (4)
-

V104

What is the highest level of education you have attained?

- High school or less (1)
  - Some college (2)
  - College graduate (3)
  - Post college education (4)
- 

V105

How many people are currently living in your household?

\_\_\_\_\_

---

Please indicate your current use of the following products.

|                   | Ever (1)              | Never (2)             | Current (3)           |
|-------------------|-----------------------|-----------------------|-----------------------|
| Tobacco use (1)   | <input type="radio"/> | <input type="radio"/> | <input type="radio"/> |
| Hookah use (2)    | <input type="radio"/> | <input type="radio"/> | <input type="radio"/> |
| Marijuana use (3) | <input type="radio"/> | <input type="radio"/> | <input type="radio"/> |

---

V110

How long have you been seeing your current Primary Care Provider?

- Less than one year (1)
  - 1 - 3 years (2)
  - 4 - 5 years (3)
  - 5 - 10 years (4)
  - More than 10 years (5)
  - NA -- I don't have a primary care provider (6)
- 

V111

What type insurance do you have?

- Private (from employer or self-purchased) (1)
  - Federal (Medicaid, Medicare, Tribal, other state sponsored) (2)
  - None (3)
-

---

Display This Question:

*If Do you consider yourself to be: = A woman*

V112

If your doctor told you that you were currently due for **cervical cancer screening**, would you be willing to get screened at home by receiving a self-sampling kit in the mail and then mailing back a **urine sample** to be tested? (All instructions on how to use the kit and a phone number to contact if you have any questions would be included).

- No, I would rather not get screened at all (1)
  - No, I would prefer to delay my screening until I could return to my doctor's office (2)
  - Maybe (5)
  - Yes, but I would only choose this option if my doctor was not offering the usual screenings at the office (3)
  - Yes, and I would choose this option even if my doctor was offering the usual screenings at the office (4)
-

---

Display This Question:

*If Do you consider yourself to be: = A woman*

V113

If your doctor told you that you were currently due for **cervical cancer screening**, would you be willing to get screened at home by receiving a self-sampling kit in the mail and then mailing back a **vaginal swab sample** to be tested? (All instructions on how to use the kit and a phone number to contact if you have any questions would be included).

- No, I would rather not get screened at all (1)
- No, I would prefer to delay my screening until I could return to my doctor's office (2)
- Maybe (5)
- Yes, but I would only choose this option if my doctor was not offering the usual screenings at the office (3)
- Yes, and I would choose this option even if my doctor was offering the usual screenings at the office (4)

---

Do you have any other comments that you might like to share with us as you reflect upon the personal impact on your health while living through this pandemic?

---

---

---

---

---

End of Block: Block 2

---
